# Supplementary material
Source: PubMed Central journal article supplement (PMC4992650)
Supplement: NIHMS800164-supplement-1.pdf [file NIHMS800164-supplement-1.pdf]

## Supplementary Figure 1

A.

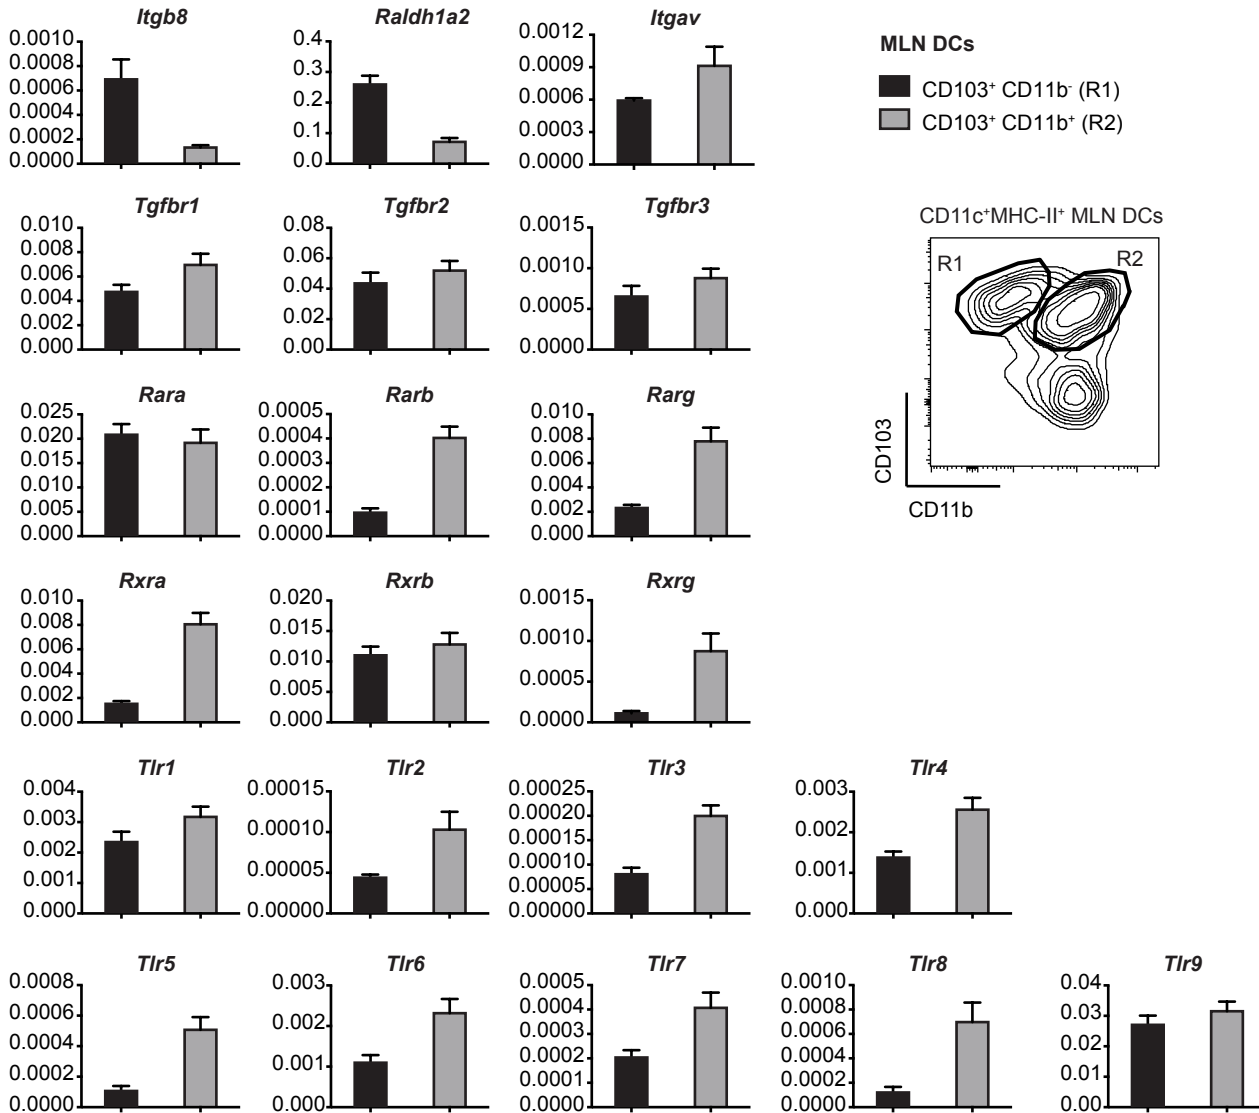

B.

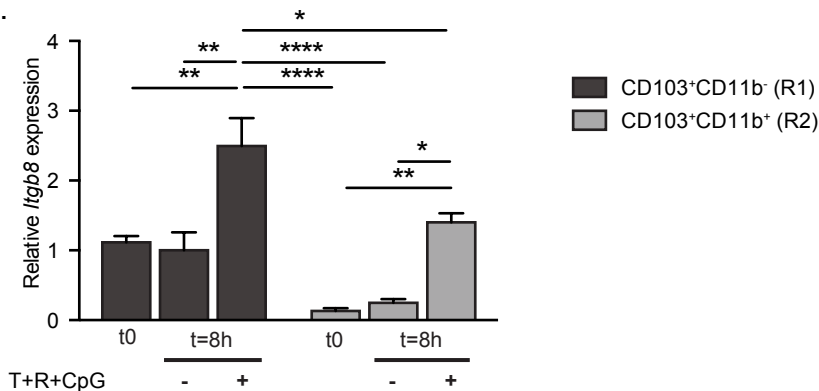

**Supplementary figure 1.** MLN DC subsets expression of  $\beta$ 8 integrin, RALDH1a2, TGF- $\beta$ , RA and Toll-like receptors. CD103<sup>+</sup>CD11b<sup>-</sup> (R1) and CD103<sup>+</sup>CD11b<sup>+</sup> (R2) MLN DC subsets were sorted by FACS. (A) For each DC subset, expression of indicated genes was measured by quantitative RT-PCR on freshly isolated cells. Histograms show mean  $\pm$  SEM from at least 4 individual mice. FACS plot shows gating strategy for MLN CD11c<sup>+</sup>MHC-II<sup>+</sup> DCs sorting. (B) MLN DC subsets were sorted as is A. *Itgb8* expression was analyzed in freshly isolated DC subsets (t0) or after stimulation for 8h with or without TGF- $\beta$ , RA and CpG ODN and presented relative to unstimulated (-) CD103<sup>+</sup>CD11b<sup>-</sup> DCs (R1). Histograms show mean  $\pm$  SEM of 4 independent pools of mice from 2 separate experiments. \*, p < 0.05; \*\*, p < 0.005; \*\*\*\*, p < 0.0001; two-way ANOVA with Tukey's post-hoc test.

## Supplementary Figure 2

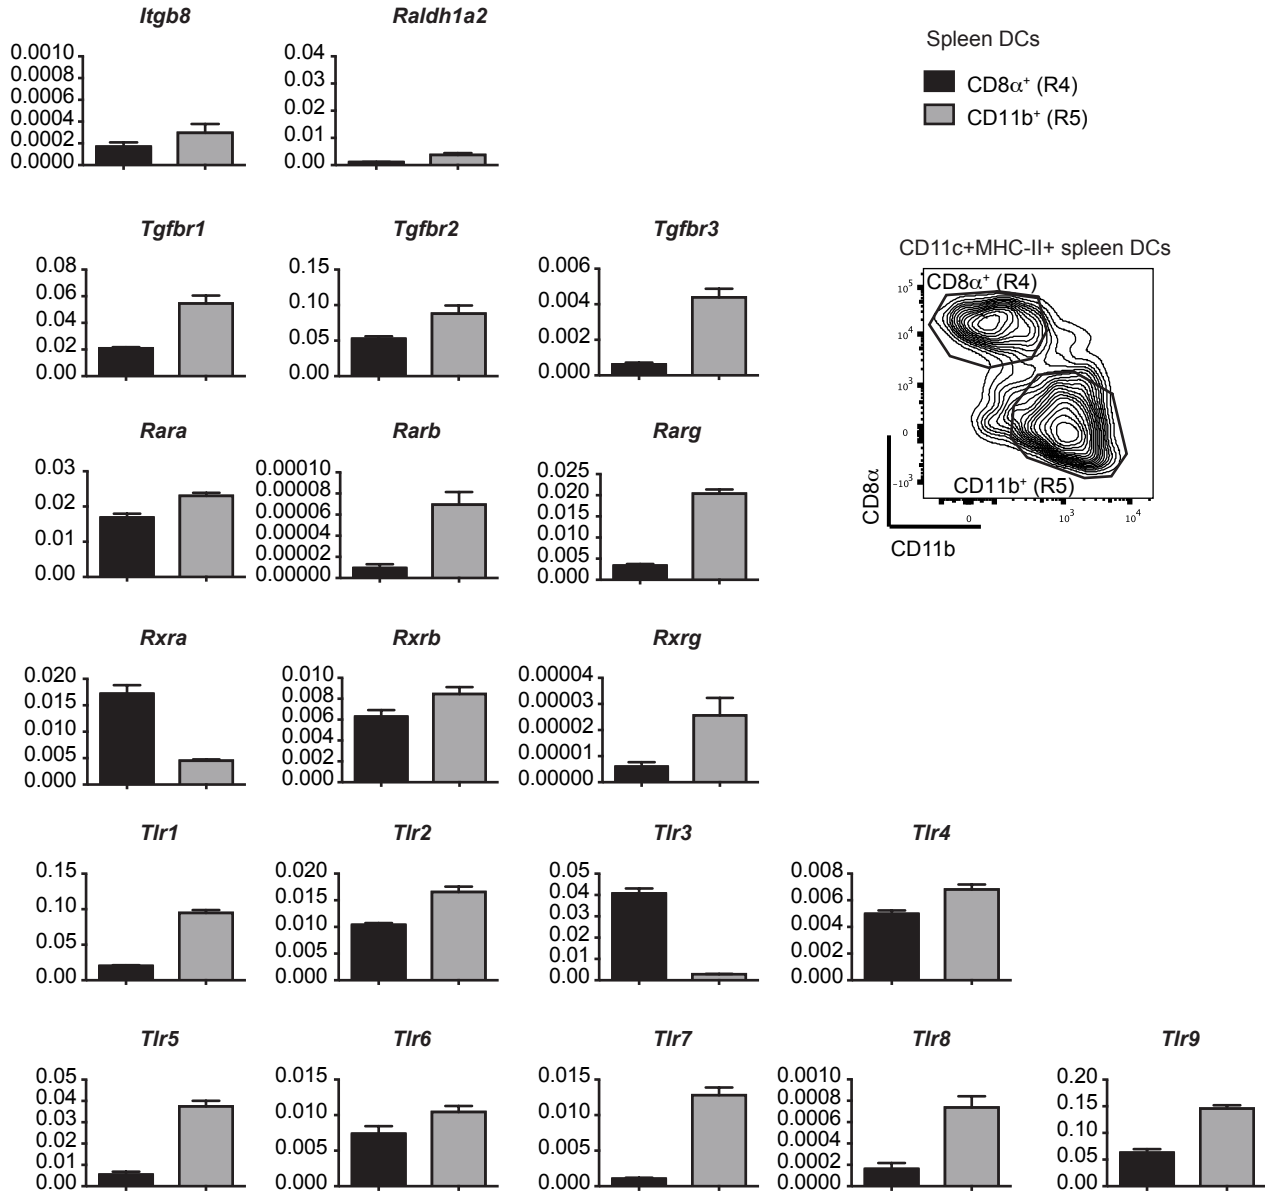

**Supplementary figure 2.** Spleen DC subsets expression of  $\beta$ 8 integrin, RALDH1a2, TGF- $\beta$ , RA and Toll-like receptors. CD8 $\alpha$ <sup>+</sup> (R4) and CD11b<sup>+</sup> (R5) spleen DC subsets were sorted by FACS. For each DC subset, expression of indicated genes was measured by quantitative RT-PCR. Histograms show mean  $\pm$  SEM from at least 4 individual mice. FACS plot shows gating strategy for spleen CD11c<sup>+</sup>MHC-II<sup>+</sup> DCs sorting.

### Supplementary Figure 3

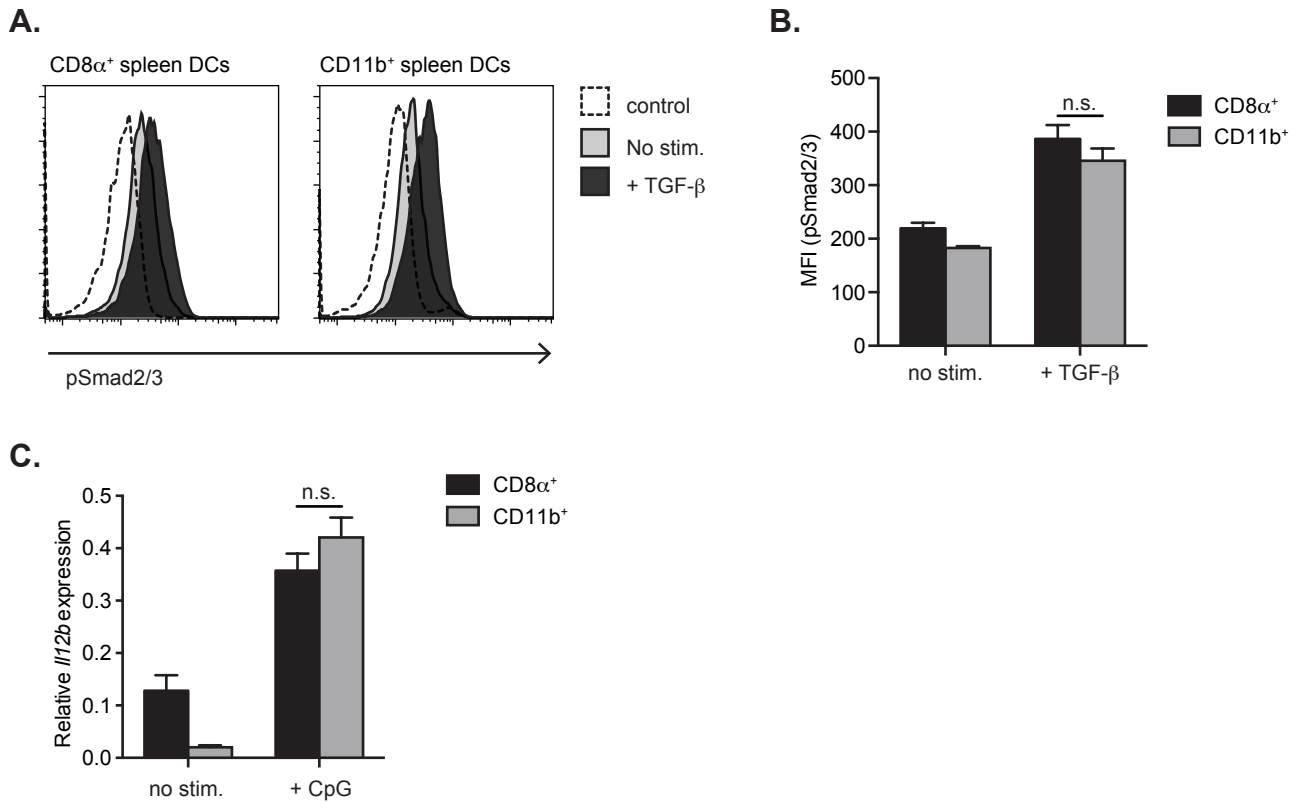

**Supplementary figure 3.** TGF- $\beta$  and TLR9 signalings are functional in both spleen DC subsets. (A-B) CD11c $^+$  spleen DCs were sorted with magnetic beads and then cultured in serum free X-vivo medium for 1h. Cells were either left untreated (no stim.) or treated with 10 ng/ml TGF- $\beta$ . After treatment, cells were surface labeled for CD11c, MHC-II, CD8 $\alpha$  and CD11b, fixed, permeabilized and labeled with anti-Phospho-Smad 2/3 (pSmad2/3) antibody (clone O72-670, BD Biosciences). (A) Representative FACS plot of CD11c $^+$ MHC-II $^+$  DCs showing pSmad2/3 labelling. (B) Histogram shows mean  $\pm$  SEM of MFI for pSmad2/3 of at least 4 individual mice. (C) FACS-sorted spleen DC subsets were cultured in serum free medium for 16h. Cells were either left untreated (no stim.) or stimulated with 2.5  $\mu$ M CpG ODN (+) and harvested in TRIzol. IL-12p40 gene (*Il12b*) expression was quantified by qRT-PCR relative to *Actb*. Histogram shows mean  $\pm$  SEM from at least 4 individual mice.
